# Supplementary material for: Formulation and Physical Characterization of a Polysaccharidic Gel for the Vehiculation of an Insoluble Phytoextract for Mucosal Application
Source: MDPI journal article supplement (doi:10.3390/polysaccharides3040042), 2022-11-09
Supplement: s1 [file s1]

Archive with 1 entries (1 files):
- polysaccharides-1914881-supplementary.pdf
