# Supplementary material for: Formulation and Physical Characterization of a Polysaccharidic Gel for the Vehiculation of an Insoluble Phytoextract for Mucosal Application
Source: MDPI journal article supplement (doi:10.3390/polysaccharides3040042), 2022-11-09
Supplement: s1 [file s1 › polysaccharides-1914881-supplementary.pdf]

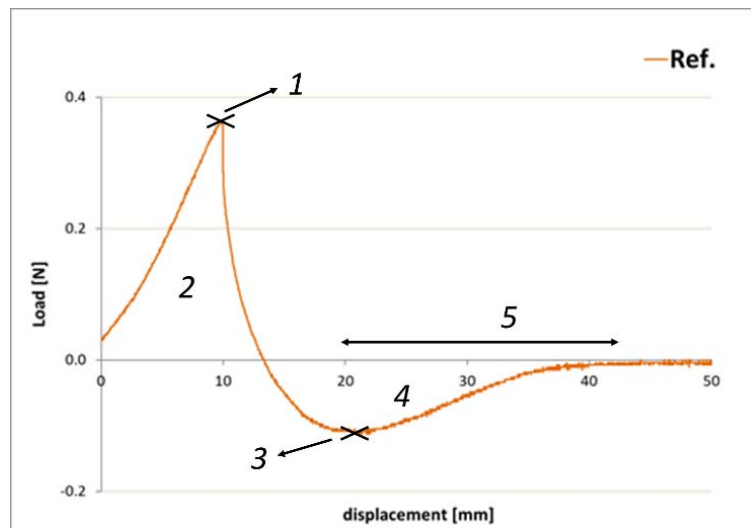

**Figure S1.** curve obtained with an immersion/de-immersion test, performed with a Texture Analyser, and the definitions of the calculated parameters: firmness (1), consistency (2), cohesiveness (3), adhesiveness (4), stringiness (5). Data plotted as load vs cumulative displacement.

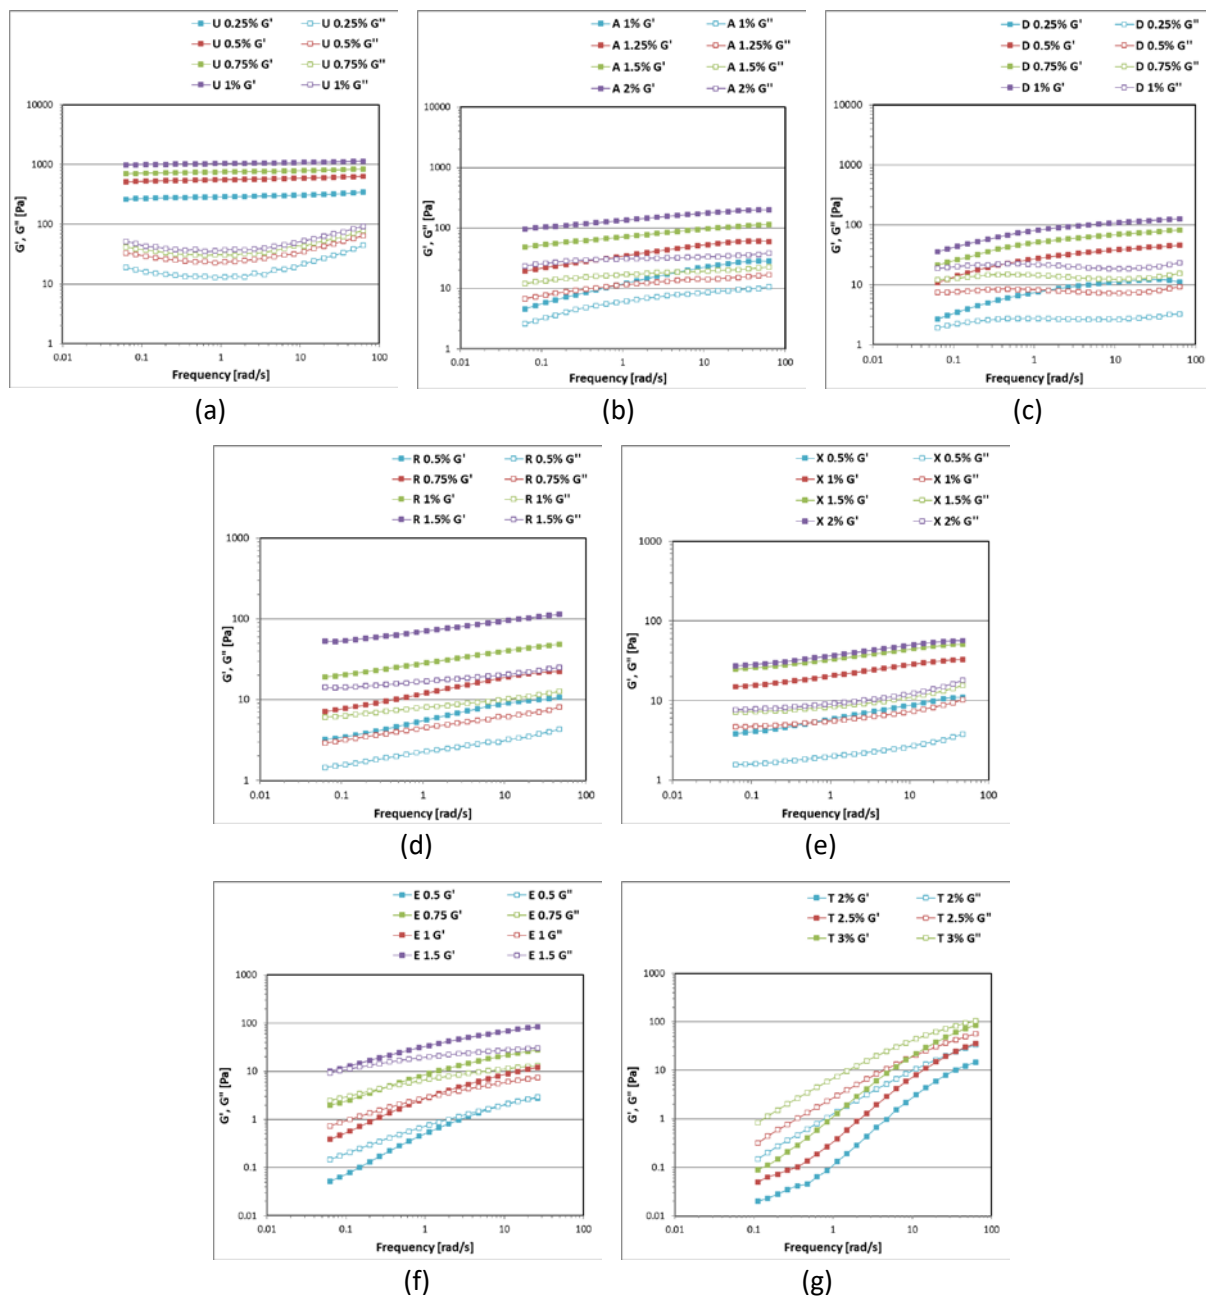

**Figure S2:** trend of the elastic  $G'$  and the viscous  $G''$  modulus as a function of the oscillation frequency for the aqueous dispersion prepared with increasing concentrations of polymers (a) U - carbomer, (b) A - sclerotium gum, (c) D - diutan gum, (d) R - succinoglycan, (e) X - xanthan gum, (f) E - C18-C22 Hydroxyalkyl Hydroxypropyl Guar, (g) T - tamarind seed polysaccharide.
